# Supplementary material for: HIV Competition Dynamics over Sexual Networks: First Comer Advantage Conserves Founder Effects
Source: PLOS journal article supplement (doi:10.1371/journal.pcbi.1004093), 2015-02-05

frequency distribution

(a)

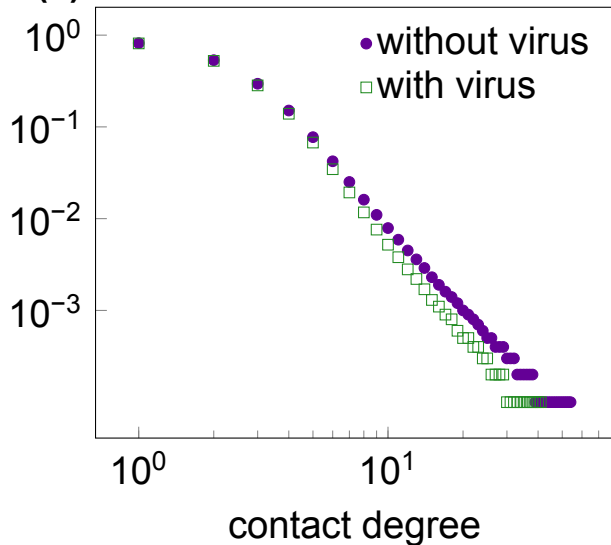

fitted exponent

(b)

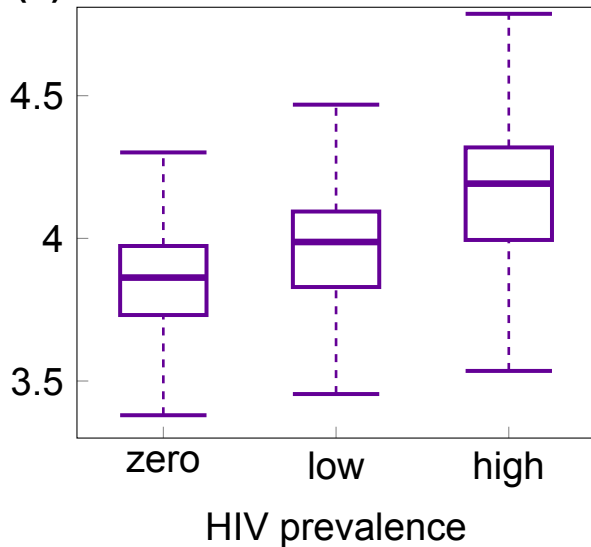

Supplement: S5 (10.1371/journal.pcbi.1004093.s005) [file journal.pcbi.1004093.s005]
